# Supplementary material for: Determinants of Successful Aging in a Cohort of Filipino Women
Source: PubMed Central journal article supplement (PMC6473400; doi:10.3390/geriatrics4010012), 2019-01-11
Supplement: geriatrics-04-00012-s001.pdf [file geriatrics-04-00012-s001.pdf]

## Supplemental Tables

Supplemental table 1

*Age-stratified univariate associations of sociodemographic and behavioral determinants of SA*

|                        | Under 60y                   |                             |                         |                            | 60y and over                |                             |                         |                            |
|------------------------|-----------------------------|-----------------------------|-------------------------|----------------------------|-----------------------------|-----------------------------|-------------------------|----------------------------|
|                        | Physiological<br>β (95% CI) | Mental Health<br>β (95% CI) | Cognitive<br>β (95% CI) | Sociological<br>β (95% CI) | Physiological<br>β (95% CI) | Mental Health<br>β (95% CI) | Cognitive<br>β (95% CI) | Sociological<br>β (95% CI) |
| Age (y)                |                             |                             |                         |                            |                             |                             |                         |                            |
| <50                    | Ref                         | Ref                         | Ref                     | Ref                        |                             |                             |                         |                            |
| 50-55                  | -0.05 [-0.28, 0.17]         | 0.19 [-0.17, 0.54]          | -0.11 [-0.54, 0.33]     | -0.24 [-0.47,-0.01]        |                             |                             |                         |                            |
| 55-60                  | -0.11 [-0.34, 0.11]         | 0.12 [-0.23, 0.47]          | -0.09 [-0.52, 0.34]     | -0.29 [-0.52,-0.07]        |                             |                             |                         |                            |
| 60-65                  |                             |                             |                         |                            | Ref                         | Ref                         | Ref                     | Ref                        |
| >65                    |                             |                             |                         |                            | -0.34 [-0.53,-0.16]         | -0.29 [-0.51,-0.08]         | -0.70 [-0.97,-0.43]     | -0.15 [-0.30,0.00]         |
| Marital Status         |                             |                             |                         |                            |                             |                             |                         |                            |
| Never                  | 0.35 [-0.39, 1.10]          | -0.47 [-1.60, 0.67]         | 0.71 [-0.68, 2.10]      | -0.13 [-0.88, 0.62]        | _a                          | _a                          | _a                      | _a                         |
| Married                | Ref                         | Ref                         | Ref                     | Ref                        | Ref                         | Ref                         | Ref                     | Ref                        |
| Widowed                | 0.01 [-0.13, 0.15]          | -0.15 [-0.37, 0.08]         | -0.37 [-0.64,-0.10]     | -0.00 [-0.15, 0.14]        | -0.30 [-0.49,-0.11]         | 0.04 [-0.19, 0.26]          | -0.47 [-0.76,-0.19]     | -0.03 [-0.19,0.12]         |
| Separated              | -0.01 [-0.23, 0.2]          | -0.06 [-0.39, 0.27]         | 0.21 [-0.20, 0.62]      | -0.14 [-0.36, 0.08]        | -0.09 [-0.64, 0.45]         | -0.28 [-0.91, 0.35]         | 0.37 [-0.44, 1.20]      | 0.33 [-0.11,0.77]          |
| Educational attainment |                             |                             |                         |                            |                             |                             |                         |                            |
| <Primary               | Ref                         | Ref                         | Ref                     | Ref                        | Ref                         | Ref                         | Ref                     | Ref                        |
| Primary                | -0.03 [-0.17, 0.11]         | -0.03 [-0.24, 0.19]         | 0.97 [0.74, 1.20]       | 0.18 [0.04, 0.32]          | -0.06 [-0.30, 0.19]         | 0.09 [-0.19, 0.36]          | 1.00 [0.69, 1.30]       | 0.22 [0.03, 0.42]          |
| Some secondary         | -0.10 [-0.23, 0.04]         | 0.07 [-0.14, 0.27]          | 1.60 [1.30, 1.80]       | 0.17 [0.03, 0.30]          | 0.09 [-0.15, 0.33]          | 0.38 [0.11, 0.65]           | 1.60 [1.30, 1.90]       | 0.17 [-0.02, 0.36]         |
| Secondary or more      | -0.04 [-0.26, 0.17]         | 0.37 [0.03, 0.70]           | 2.00 [1.60, 2.40]       | 0.17 [-0.05, 0.39]         | 0.08 [-0.22, 0.37]          | 0.68 [0.34, 1.00]           | 2.30 [1.90, 2.70]       | 0.26 [0.03, 0.50]          |
| Urbanicity             |                             |                             |                         |                            |                             |                             |                         |                            |
| Lowest tertile         | Ref                         | Ref                         | Ref                     | Ref                        | Ref                         | Ref                         | Ref                     | Ref                        |
| Mid tertile            | -0.21 [-0.35,-0.08]         | 0.01 [-0.20, 0.23]          | 0.18 [-0.08, 0.44]      | -0.08 [-0.22, 0.06]        | -0.25 [-0.48,-0.02]         | 0.05 [-0.22, 0.31]          | 0.40 [0.06, 0.74]       | -0.05 [-0.24, 0.13]        |
| Highest tertile        | -0.29 [-0.42,-0.15]         | 0.13 [-0.08, 0.34]          | 0.11 [-0.15, 0.37]      | 0.05 [-0.09, 0.18]         | -0.38 [-0.61,-0.15]         | 0.02 [-0.25, 0.28]          | 0.55 [0.21, 0.89]       | 0.01 [-0.17, 0.19]         |
| Urban SES              |                             |                             |                         |                            |                             |                             |                         |                            |
| Lowest tertile         | Ref                         | Ref                         | Ref                     | Ref                        | Ref                         | Ref                         | Ref                     | Ref                        |
| Mid tertile            | -0.02 [-0.17, 0.14]         | 0.05 [-0.20, 0.30]          | 0.74 [0.44, 1.00]       | 0.12 [-0.05, 0.28]         | 0.02 [-0.24, 0.28]          | 0.09 [-0.21, 0.38]          | 0.40 [0.05, 0.76]       | -0.08 [-0.29, 0.12]        |
| Highest tertile        | -0.07 [-0.23, 0.08]         | 0.08 [-0.16, 0.31]          | 1.00 [0.73, 1.30]       | 0.15 [0.00, 0.31]          | -0.01 [-0.26, 0.25]         | 0.12 [-0.17, 0.41]          | 1.60 [1.20, 1.90]       | -0.01 [-0.20, 0.20]        |
| Rural SES              |                             |                             |                         |                            |                             |                             |                         |                            |
| Lowest tertile         | Ref                         | Ref                         | Ref                     | Ref                        | Ref                         | Ref                         | Ref                     | Ref                        |
| Mid tertile            | -0.06 [-0.22, 0.10]         | 0.13 [-0.12, 0.38]          | 0.13 [-0.18, 0.44]      | 0.23 [0.07, 0.40]          | -0.07 [-0.36, 0.21]         | 0.08 [-0.25, 0.41]          | 0.40 [0.00, 0.81]       | -0.02 [-0.25, 0.20]        |
| Highest                | -0.07 [-0.22, 0.09]         | 0.10 [-0.14, 0.34]          | 0.40 [0.10, 0.70]       | 0.15 [-0.01, 0.30]         | 0.14 [-0.13, 0.41]          | 0.22 [-0.10, 0.53]          | 1.30 [0.95, 1.70]       | 0.00 [-0.22, 0.22]         |

|                |                     |                     |                     |                     |                     |                     |                     |                    |
|----------------|---------------------|---------------------|---------------------|---------------------|---------------------|---------------------|---------------------|--------------------|
| tertile        |                     |                     |                     |                     |                     |                     |                     |                    |
| Household      |                     |                     |                     |                     |                     |                     |                     |                    |
| Composition    |                     |                     |                     |                     |                     |                     |                     |                    |
| Single         |                     |                     |                     |                     |                     |                     |                     |                    |
| person         | 0.25 [-0.23, 0.73]  | 0.14 [-0.61, 0.89]  | -0.42 [-1.30, 0.50] | -0.25[-0.73, 0.23]  | -0.93 [-1.50,-0.33] | -0.17 [-0.86, 0.51] | -0.50 [-1.40, 0.39] | 0.16 [-0.31, 0.63] |
| One nuclear    |                     |                     |                     |                     |                     |                     |                     |                    |
| family         | Ref                 | Ref                 | Ref                 | Ref                 | Ref                 | Ref                 | Ref                 | Ref                |
| Horiz. and/or  |                     |                     |                     |                     |                     |                     |                     |                    |
| vert. ext.     |                     |                     |                     |                     |                     |                     |                     |                    |
| family         | -0.07 [-0.21, 0.08] | 0.05 [-0.18, 0.28]  | -0.14 [-0.43, 0.14] | 0.47 [0.32, 0.61]   | -0.24 [-0.50, 0.02] | 0.07 [-0.23, 0.37]  | -0.01 [-0.39, 0.38] | 0.34 [0.14, 0.55]  |
| Multi-         |                     |                     |                     |                     |                     |                     |                     |                    |
| nuclear family | -0.08 [-0.20, 0.05] | -0.08 [-0.27, 0.11] | 0.13 [-0.11, 0.36]  | 0.32 [0.19, 0.44]   | 0.01 [-0.22, 0.24]  | 0.09 [-0.17, 0.36]  | 0.25 [-0.09, 0.59]  | 0.22 [0.04, 0.40]  |
| Smoking        |                     |                     |                     |                     |                     |                     |                     |                    |
| Status         | -0.03 [-0.14, 0.09] | 0.10 [-0.08, 0.27]  | -0.16 [-0.38, 0.06] | -0.10 [-0.22, 0.02] | 0.01 [-0.19, 0.20]  | 0.14 [-0.09, 0.37]  | -0.37 [-0.67,-0.08] | 0.06 [-0.10, 0.22] |
| Alcohol        |                     |                     |                     |                     |                     |                     |                     |                    |
| Consumer       | 0.01 [-0.09, 0.12]  | -0.01 [-0.18, 0.15] | -0.02 [-0.22, 0.18] | 0.10 [-0.01, 0.21]  | 0.07 [-0.12, 0.26]  | 0.09 [-0.12, 0.30]  | 0.10 [-0.17, 0.38]  | 0.12 [-0.02, 0.27] |
| Employed       | 0.13 [0.02, 0.25]   | 0.28 [0.10, 0.46]   | 0.11 [-0.12, 0.33]  | - <sup>b</sup>      | 0.33 [0.14, 0.52]   | 0.29 [.08, 0.50]    | -0.23 [-0.51, 0.05] | - <sup>b</sup>     |
| Insured        | 0.02 [-0.08, 0.13]  | 0.11 [-0.06, 0.27]  | 0.56 [0.36, 0.76]   | 0.15 [0.04, 0.25]   | 0.12 [-0.09, 0.33]  | 0.15 [-0.09, 0.38]  | 0.38 [0.08, 0.69]   | 0.08 [-0.08, 0.25] |

*Note.* <sup>a</sup> No observations for never married participants over age 60y.

<sup>b</sup> Not analyzed due to inclusion of employment in construction of sociological domain variable.



|                                                            |                    |                    |                     |                     |                     |                    |                    |                    |
|------------------------------------------------------------|--------------------|--------------------|---------------------|---------------------|---------------------|--------------------|--------------------|--------------------|
| (ref)                                                      |                    |                    |                     |                     |                     |                    |                    |                    |
| Mid tertile                                                | -0.1 [-0.29,0.10]  | 0.13 [-0.17,0.44]  | -0.34 [-0.67,-0.01] | 0.12 [-0.07,0.31]   | -0.05 [-0.40,0.30]  | 0.1 [-0.30,0.51]   | 0.06 [-0.39,0.52]  | -0.01 [-0.30,0.27] |
| High tertile                                               | -0.13 [-0.37,0.11] | 0.09 [-0.28,0.46]  | -0.52 [-0.93,-0.12] | -0.07 [-0.30,0.16]  | 0.16 [-0.26,0.58]   | 0.25 [-0.24,0.74]  | 0.48 [-0.07,1.03]  | -0.05 [-0.39,0.29] |
| Household<br>Composition                                   |                    |                    |                     |                     |                     |                    |                    |                    |
| Single<br>person                                           | 0.17 [-0.34,0.68]  | 0.26 [-0.53,1.06]  | -0.31 [-1.18,0.57]  | -0.19 [-0.69,0.31]  | -0.88 [-1.49,-0.27] | -0.14 [-0.84,0.56] | 0 [-0.80,0.79]     | 0.19 [-0.30,0.68]  |
| One nuclear<br>family (ref)                                |                    |                    |                     |                     |                     |                    |                    |                    |
| Horizontally<br>and/or<br>vertically<br>extended<br>family | -0.05 [-0.20,0.10] | 0.03 [-0.20,0.27]  | -0.03 [-0.29,0.23]  | 0.50 [0.35,0.65]    | -0.18 [-0.44,0.07]  | 0.13 [-0.17,0.43]  | 0.05 [-0.28,0.39]  | 0.37 [0.16,0.58]   |
| Multi-<br>nuclear family                                   | -0.03 [-0.16,0.09] | -0.1 [-0.30,0.10]  | 0.19 [-0.03,0.41]   | 0.35 [0.22,0.47]    | 0.1 [-0.13,0.33]    | 0.14 [-0.13,0.40]  | 0.06 [-0.23,0.36]  | 0.22 [0.04,0.41]   |
| Smoking<br>Status                                          | -0.01 [-0.13,0.11] | 0.13 [-0.05,0.31]  | -0.02 [-0.23,0.18]  | -0.14 [-0.25,-0.02] | 0 [-0.20,0.20]      | 0.2 [-0.03,0.44]   | -0.08 [-0.34,0.18] | 0.09 [-0.07,0.25]  |
| Alcohol<br>Consumer                                        | 0.01 [-0.10,0.12]  | -0.03 [-0.20,0.13] | 0.02 [-0.16,0.21]   | 0.14 [0.03,0.25]    | 0.07 [-0.12,0.25]   | 0.06 [-0.16,0.27]  | 0.16 [-0.07,0.40]  | 0.12 [-0.03,0.27]  |
| Employed                                                   | 0.13 [0.01,0.25]   | 0.28 [0.09,0.46]   | 0.22 [0.01,0.43]    | - <sup>b</sup>      | 0.30 [0.11,0.49]    | 0.32 [0.10,0.54]   | -0.01 [-0.25,0.23] | - <sup>b</sup>     |
| Insured                                                    | 0.02 [-0.09,0.13]  | 0.06 [-0.12,0.23]  | 0.26 [0.07,0.45]    | 0.12 [0.02,0.23]    | 0.1 [-0.11,0.31]    | 0.11 [-0.14,0.35]  | 0.05 [-0.22,0.32]  | 0.04 [-0.13,0.21]  |
| F                                                          | 1.43               | 1.25               | 12.98***            | 4.92***             | 3.29***             | 2.56***            | 13.23***           | 1.89**             |
| R <sup>2</sup>                                             | 0.0309             | 0.0271             | 0.2254              | 0.0942              | 0.0981              | 0.078              | 0.3114             | 0.0558             |

Note. <sup>a</sup> No observations for never married participants over age 60y.

<sup>b</sup> Not analyzed due to inclusion of employment in construction of sociological domain variable.

\*  $p < .05$ , \*\*  $p < .01$ , \*\*\*  $p < .001$
